# Supplementary material
Source: PubMed Central journal article supplement (PMC3130846)
Supplement: NIHMS287320-supplement-1.pdf [file NIHMS287320-supplement-1.pdf]

## Supplementary Information

### **Integrating energy calculations with functional assays to decipher the specificity of G-protein inactivation by RGS proteins**

Mickey Kosloff<sup>1</sup>, Amanda M. Travis<sup>1</sup>, Dustin E. Bosch<sup>2</sup>, David P. Siderovski<sup>2</sup> and Vadim Y. Arshavsky<sup>1</sup>

<sup>1</sup>*Duke Eye Center, Duke University Medical Center, Durham, NC 27710, USA.* <sup>2</sup>*Department of Pharmacology, The University of North Carolina at Chapel Hill, Chapel Hill, NC 27599, USA.*

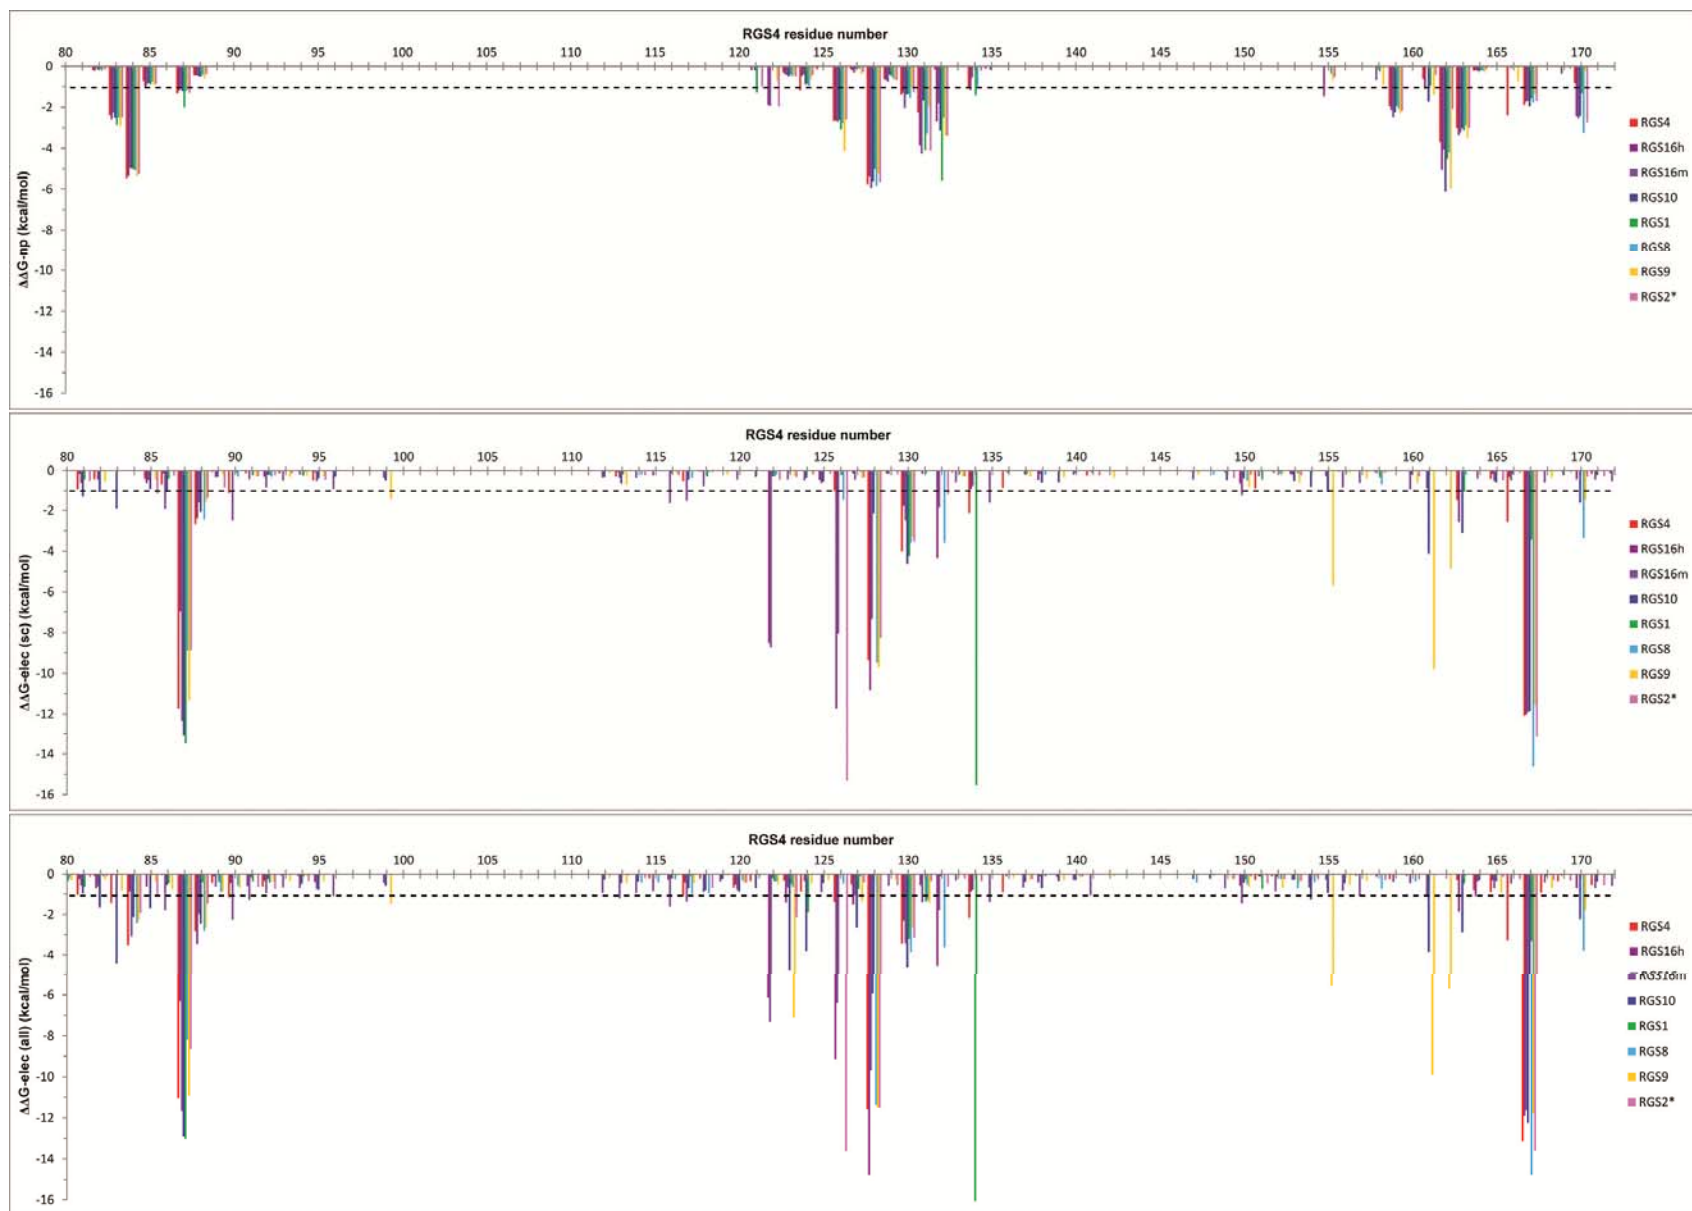

**Supplementary Figure 1: Per-residue energetic contributions to the interaction of RGS domains with G $\alpha$  subunits**, calculated as described in Methods. np=non-polar, sc=side-chain, all=full-residue. The dashed lines mark the 1 kcal/mol threshold used to determine substantial contributions to the interaction.

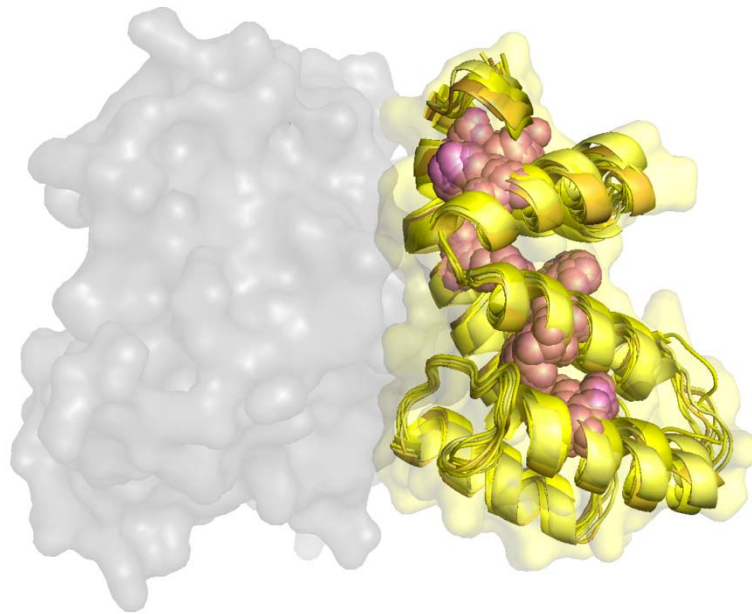

**Supplementary Figure 2: RGS4 residues mutated in previous studies that belong to the conserved RGS domain hydrophobic core.** Superimposed RGS domain structures are depicted as ribbon diagrams with residues corresponding to Phe79, Phe91, Trp92, Ile114, Phe149, Met160, and Phe168 in RGS4, shown as pink spheres.

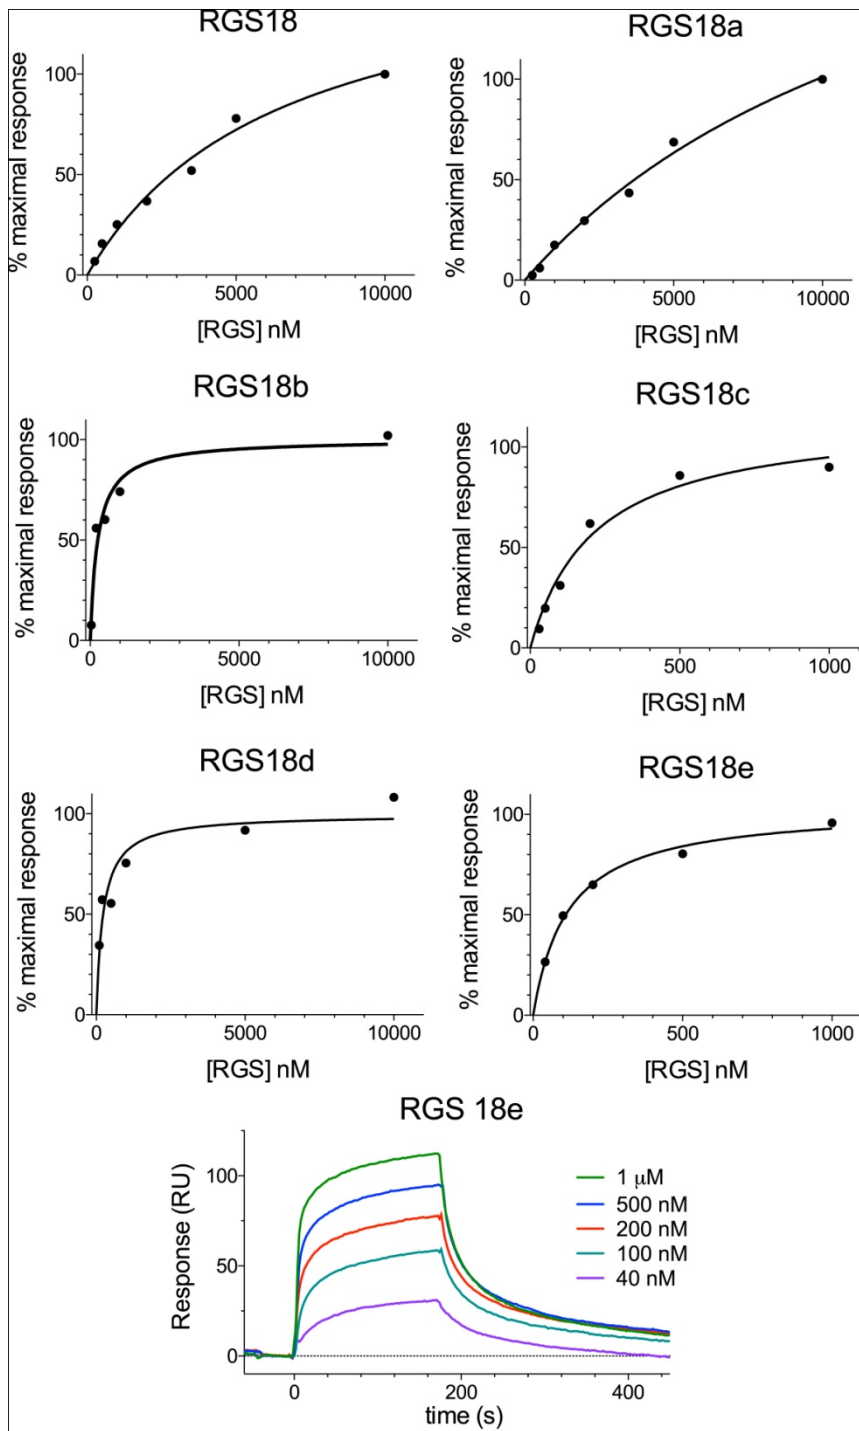

**Supplementary Figure 3: Determination of RGS18 mutants' binding affinity for  $G\alpha_o$ .** SPR was performed as described in Supplementary Methods. Sensorgrams were used in equilibrium saturation binding analyses to determine binding affinities for all RGS18 mutants. Precise  $K_D$  values for RGS18 (wild-type) and RGS18a could not be determined because saturation was not reached at the concentrations tested. Individual sensorgrams from a representative series of RGS18e injections are shown at the bottom.

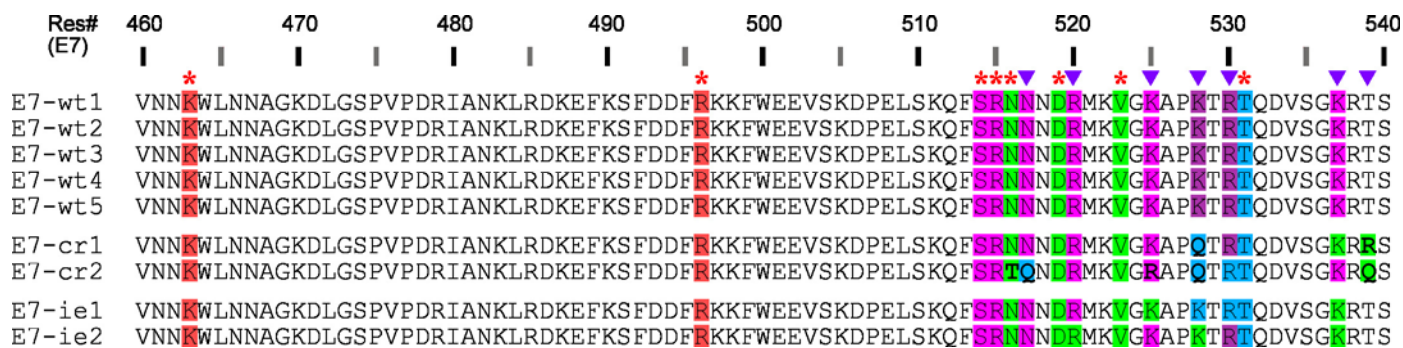

**Supplementary Figure 4: Colicin E7 residues contributing substantially to the interactions with immunity proteins.** The figure shows the residue-level sequence map (as in Fig. 6a) of the E7 proteins. Energy calculations were performed on the following structures (PDB IDs): Wild-type E7–Im7 complexes (wt1–5: 7CEI, 2JAZ, 2JB0, 2JBG, 1ZNV); Computationally-redesigned E7–Im7 (cr1–2: 1UJZ, 2ERH); E7 bound to Im9 proteins evolved *in vitro* to bind E7 with high affinity (ie1–2: 3GJN, 3GKL). The sequences in the multiple sequence alignment are taken from the crystal structures. Residues that contribute substantially to the interaction are color-coded according to the type of energy contribution (see legend in Fig. 6). Consensus analysis was applied to the five wild-type proteins and Significant & Conserved and Modulatory positions were determined for all nine structures as in Figures 2 and 6.

## Supplementary Table 1: Sequence identities among Human RGS domains

RGS sub-families:

| RGS domains       | R4             |                |                   |                |                |                |                 |                 |                 | R7              |                 |                 |                  | R12             |                  |                 | RZ              |                 |                  |
|-------------------|----------------|----------------|-------------------|----------------|----------------|----------------|-----------------|-----------------|-----------------|-----------------|-----------------|-----------------|------------------|-----------------|------------------|-----------------|-----------------|-----------------|------------------|
|                   | RGS1<br>72-187 | RGS2<br>83-199 | RGS3<br>1073-1198 | RGS4<br>62-178 | RGS5<br>64-180 | RGS8<br>56-171 | RGS13<br>34-150 | RGS16<br>65-181 | RGS18<br>86-202 | RGS6<br>336-441 | RGS7<br>333-448 | RGS9<br>298-413 | RGS11<br>299-414 | RGS10<br>33-148 | RGS12<br>715-832 | RGS14<br>67-184 | RGS17<br>84-200 | RGS19<br>90-206 | RGS20<br>262-378 |
| RGS1<br>72-187    |                | 53             | 54                | 55             | 53             | 54             | 49              | 52              | 53              | 40              | 40              | 47              | 43               | 46              | 41               | 40              | 40              | 45              | 43               |
| RGS2<br>83-199    | 53             |                | 55                | 52             | 56             | 60             | 50              | 58              | 56              | 37              | 39              | 37              | 34               | 37              | 37               | 37              | 38              | 41              | 42               |
| RGS3<br>1073-1198 | 54             | 55             |                   | 61             | 59             | 62             | 47              | 60              | 53              | 41              | 40              | 41              | 42               | 44              | 42               | 39              | 43              | 47              | 47               |
| RGS4<br>62-178    | 55             | 52             | 61                |                | 57             | 58             | 50              | 56              | 53              | 34              | 34              | 39              | 38               | 43              | 40               | 41              | 40              | 43              | 46               |
| RGS5<br>64-180    | 53             | 56             | 59                | 57             |                | 59             | 42              | 56              | 56              | 38              | 42              | 44              | 41               | 41              | 37               | 42              | 40              | 41              | 45               |
| RGS8<br>56-171    | 54             | 60             | 62                | 58             | 59             |                | 48              | 73              | 55              | 37              | 40              | 41              | 44               | 43              | 41               | 41              | 40              | 48              | 47               |
| RGS13<br>34-150   | 49             | 50             | 47                | 50             | 42             | 48             |                 | 46              | 42              | 31              | 34              | 34              | 34               | 31              | 33               | 31              | 37              | 42              | 44               |
| RGS16<br>65-181   | 52             | 58             | 60                | 56             | 56             | 73             | 46              |                 | 52              | 39              | 39              | 41              | 43               | 40              | 43               | 43              | 40              | 47              | 45               |
| RGS18<br>86-202   | 53             | 56             | 53                | 53             | 56             | 55             | 42              | 52              |                 | 38              | 36              | 40              | 41               | 41              | 37               | 39              | 44              | 44              | 49               |
| RGS6<br>336-441   | 40             | 37             | 41                | 34             | 38             | 37             | 31              | 39              | 38              |                 | 80              | 48              | 47               | 37              | 37               | 38              | 39              | 37              | 36               |
| RGS7<br>333-448   | 40             | 39             | 40                | 34             | 42             | 40             | 34              | 39              | 36              | 80              |                 | 48              | 48               | 37              | 39               | 39              | 39              | 38              | 39               |
| RGS9<br>298-413   | 47             | 37             | 41                | 39             | 44             | 41             | 34              | 41              | 40              | 48              | 48              |                 | 62               | 44              | 41               | 42              | 39              | 39              | 35               |
| RGS11<br>299-414  | 43             | 34             | 42                | 38             | 41             | 44             | 34              | 43              | 41              | 47              | 48              | 62              |                  | 44              | 45               | 44              | 39              | 43              | 41               |
| RGS10<br>33-148   | 46             | 37             | 44                | 43             | 41             | 43             | 31              | 40              | 41              | 37              | 37              | 44              | 44               |                 | 53               | 54              | 41              | 38              | 39               |
| RGS12<br>715-832  | 41             | 37             | 42                | 40             | 37             | 41             | 33              | 43              | 37              | 37              | 39              | 41              | 45               | 53              |                  | 63              | 37              | 37              | 37               |
| RGS14<br>67-184   | 40             | 37             | 39                | 41             | 42             | 41             | 31              | 43              | 39              | 38              | 39              | 42              | 44               | 54              | 63               |                 | 34              | 40              | 37               |
| RGS17<br>84-200   | 40             | 38             | 43                | 40             | 40             | 40             | 37              | 40              | 44              | 39              | 39              | 39              | 39               | 41              | 37               | 34              |                 | 69              | 76               |
| RGS19<br>90-206   | 45             | 41             | 47                | 43             | 41             | 48             | 42              | 47              | 44              | 37              | 38              | 39              | 43               | 38              | 37               | 40              | 69              |                 | 76               |
| RGS20<br>262-378  | 43             | 42             | 47                | 46             | 45             | 47             | 44              | 45              | 49              | 36              | 39              | 35              | 41               | 39              | 37               | 37              | 76              | 76              |                  |

<sup>a</sup> Sequence identities were calculated using t-coffee v.4.67

<sup>b</sup> the numerical range marks the first and last residue of the RGS domain in each RGS protein according to Uniprot annotation

**Supplementary Table 2: “Hot spots” in RGS proteins identified by Rosetta’s computational alanine scanning**

|                                     | Number of predicted hot spots <sup>b</sup> | Number of predicted hot spots identified in our study as Significant & Conserved | Number of predicted hot spots identified in our study as Modulatory | Number of predicted hot spots that correspond to experimental “neutral residues” <sup>c</sup> |
|-------------------------------------|--------------------------------------------|----------------------------------------------------------------------------------|---------------------------------------------------------------------|-----------------------------------------------------------------------------------------------|
| G $\alpha_{i1}$ -RGS4               | 9                                          | 6                                                                                | 1                                                                   | 2                                                                                             |
| G $\alpha_{i1}$ -RGS16              | 5                                          | 5                                                                                | -                                                                   | -                                                                                             |
| G $\alpha_o$ -RGS16                 | 8                                          | 6                                                                                | -                                                                   | 2                                                                                             |
| G $\alpha_{i3}$ -RGS10              | 8                                          | 7                                                                                | 1                                                                   | -                                                                                             |
| G $\alpha_{i1}$ -RGS1               | 8                                          | 8                                                                                | -                                                                   | -                                                                                             |
| G $\alpha_{i3}$ -RGS8               | 9                                          | 7                                                                                | 2                                                                   | -                                                                                             |
| G $\alpha_{\nu i}$ -RGS9            | 8                                          | 7                                                                                | 1                                                                   | -                                                                                             |
| G $\alpha_{i3}$ -RGS2* <sup>d</sup> | 11                                         | 8                                                                                | 1                                                                   | 2                                                                                             |

<sup>a</sup> Hot spot calculations were performed as in refs. 1,2.

<sup>b</sup> Residues with a predicted  $\Delta\Delta G_{\text{binding}} > 1$  kcal/mol (i.e. mutation to alanine predicted to destabilize the complex by  $>1$  kcal/mol)

<sup>c</sup> Residues whose mutation to alanine did not impair RGS function in refs. 3-7.

<sup>d</sup> C106S/N184D/E191K gain-of-function triple mutant.

<sup>e</sup> The particular Modulatory residues identified by Rosetta are characterized by considerable surface area buried upon complex formation ( $>50\text{\AA}$ ).

## Supplementary Methods

**Protein expression, purification and GTPase assays.** Clones for the RGS domains of human RGS1, RGS7, RGS8, RGS10, RGS14, RGS16, RGS17, RGS18 were provided by the Structural Genomics Consortium (Oxford, UK). RGS domains were expressed in the pLIC-SGC1 vector as N-terminally His<sub>6</sub>-tagged fusion proteins<sup>8</sup>. The N-terminally His<sub>6</sub>-tagged rat Gα<sub>o</sub> clone was a gift from Nikolai Artemyev (U. Iowa). Proteins were expressed and purified following ref. 8 as follows: Proteins were expressed in *E. coli* BL21(DE3) cells and grown in 0.5 liters of LB broth at 37°C until an OD<sub>600 nm</sub> of ~0.6. The temperature was then reduced to 29°C and protein expression was induced by addition of 0.5 mM isopropyl-D-thiogalactopyranoside. Cells were harvested by centrifugation after 4 h followed by freezing the pellet at -80°C. Bacterial pellets were resuspended in Lysis Buffer (50 mM Tris, pH 8.0, 50 mM NaCl, 5 mM β-mercaptoethanol, protease inhibitor cocktail (Roche)) and the cells were lysed using a Sonifier 450 (Branson Ultrasonics), followed by centrifugation at 27,000 g for 30 min at 4°C. The supernatant was equilibrated to 500 mM NaCl and 20 mM imidazole and loaded onto Ni-NTA agarose beads (Qiagen) in a glass column at 4°C. The column was washed with >20 volumes of Wash Buffer (20 mM Tris, pH 8.0, 500 mM NaCl, 20 mM imidazole) and the tagged proteins were eluted with Elution Buffer (20 mM Tris, pH 8.0, 500 mM NaCl, 100 mM imidazole). The eluate was dialyzed against Dialysis Buffer (50 mM Tris, pH 8.0, 40% (v/v) glycerol, 50 mM NaCl, 5 mM β-mercaptoethanol). All purified proteins were estimated to be >95% pure, as assessed by SDS-PAGE electrophoresis. Protein concentration was determined by A<sub>280 nm</sub> using predicted extinction coefficients (ProtParam, Swiss Institute for Bioinformatics).

**Single turnover GTPase assays.** Single turnover GTPase assays using recombinant Gα<sub>o</sub> and various RGS proteins were conducted as in refs. 9,10. Briefly, Gα<sub>o</sub> in Reaction Buffer (50 mM HEPES, pH 7.5, 50 mM NaCl, 0.05% (v/v) polyoxyethylene, 5 mM EDTA, 5 mg ml<sup>-1</sup> BSA, 1 mM dithiothreitol) was incubated for 15 min at 25°C with 1 mM [γ-<sup>32</sup>P]GTP and cooled on ice for 5 min. GTP hydrolysis was initiated by 10 mM MgCl<sub>2</sub> with 100 mM cold GTP (final concentrations) with or without RGS proteins at 4°C. Aliquots, taken at 7–8 different time points, were quenched with 5% charcoal in 50 mM Na<sub>2</sub>H<sub>2</sub>PO<sub>4</sub> (pH 3), followed by centrifugation and liquid scintillation analysis of <sup>32</sup>P<sub>i</sub> in supernatants. GTPase rates were determined from single exponential fits to the time courses. k<sub>gap</sub> rate constants were determined by subtracting the basal GTPase rate (without RGS protein) from the GTPase rate measured in the presence of the RGS protein<sup>9,10</sup>.

**Surface Plasmon Resonance (SPR) Assays.** Gα<sub>o</sub> was expressed with a C-terminal Biotin tag and immobilized to a streptavidin chip as described<sup>11</sup>. SPR binding experiments were conducted using a Biacore 3000 or 2000 biosensor (GE Healthcare) after equilibrating the sensor surfaces, pump, and fluidic systems with 10 mM HEPES (pH 7.4), 150 mM NaCl, 6 mM MgCl<sub>2</sub>, 0.05% (v/v) Nonidet P-40, and GDP–AlF<sub>4</sub><sup>-</sup> (100 mM GDP, 20 mM NaF, 30 mM AlCl<sub>3</sub>). Maximal resonance units achieved with each injection, as a percentage of the highest measurement, were plotted against RGS concentration. K<sub>D</sub> values were calculated by fitting the dose response curves to a single site binding equation using GraphPad Prism 5.0, and K<sub>D</sub> values from independent experiments were combined as weighed averages with respect to their corresponding error in a maximum likelihood framework<sup>12</sup>.



## References:

1. Kortemme, T. & Baker, D. A simple physical model for binding energy hot spots in protein-protein complexes. *Proc Natl Acad Sci U S A* **99**, 14116-21 (2002).
2. Kortemme, T., Kim, D.E. & Baker, D. Computational alanine scanning of protein-protein interfaces. *Sci STKE* **2004**, pl2 (2004).
3. Srinivasa, S.P., Watson, N., Overton, M.C. & Blumer, K.J. Mechanism of RGS4, a GTPase-activating protein for G protein alpha subunits. *J Biol Chem* **273**, 1529-33 (1998).
4. Tesmer, J.J., Berman, D.M., Gilman, A.G. & Sprang, S.R. Structure of RGS4 bound to AlF<sub>4</sub>--activated G(i alpha1): stabilization of the transition state for GTP hydrolysis. *Cell* **89**, 251-61 (1997).
5. Posner, B.A., Mukhopadhyay, S., Tesmer, J.J., Gilman, A.G. & Ross, E.M. Modulation of the affinity and selectivity of RGS protein interaction with G alpha subunits by a conserved asparagine/serine residue. *Biochemistry* **38**, 7773-9 (1999).
6. Natochin, M., McEntaffer, R.L. & Artemyev, N.O. Mutational analysis of the Asn residue essential for RGS protein binding to G-proteins. *J Biol Chem* **273**, 6731-5 (1998).
7. Wieland, T., Bahtijari, N., Zhou, X.B., Kleuss, C. & Simon, M.I. Polarity exchange at the interface of regulators of G protein signaling with G protein alpha-subunits. *J Biol Chem* **275**, 28500-6 (2000).
8. Soundararajan, M. et al. Structural diversity in the RGS domain and its interaction with heterotrimeric G protein alpha-subunits. *Proc Natl Acad Sci U S A* **105**, 6457-62 (2008).
9. Krumins, A.M. & Gilman, A.G. Assay of RGS protein activity in vitro using purified components. *Methods Enzymol* **344**, 673-85 (2002).
10. Ross, E.M. Quantitative assays for GTPase-activating proteins. *Methods Enzymol* **344**, 601-17 (2002).
11. Hutsell, S.Q., Kimple, R.J., Siderovski, D.P., Willard, F.S. & Kimple, A.J. High-affinity immobilization of proteins using biotin- and GST-based coupling strategies. *Methods Mol Biol* **627**, 75-90 (2010).
12. Kay, S.M. *Fundamentals of statistical signal processing*, (Prentice-Hall PTR, Englewood Cliffs, N.J., 1993).
